# Supplementary material for: GDF11 alleviates neointimal hyperplasia in a rat model of artery injury by regulating endothelial NLRP3 inflammasome activation and rapid re-endothelialization
Source: PubMed Central journal article supplement (PMC8760779; doi:10.1186/s12967-022-03229-6), 2022-01-15

GFP

DAPI

Merge

PBS

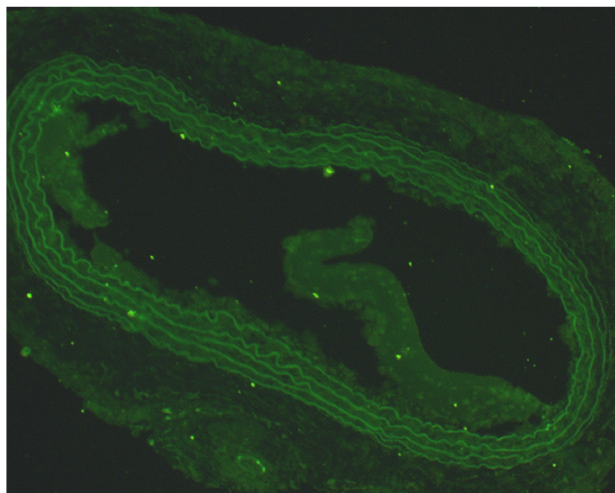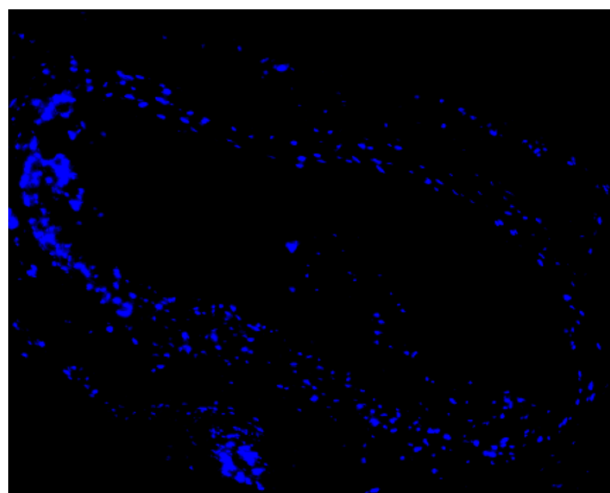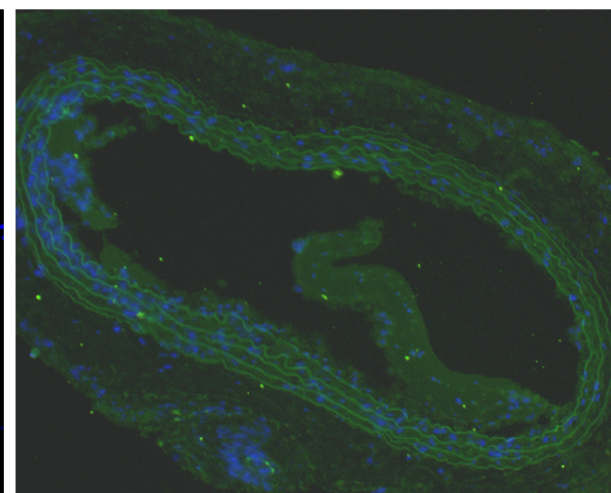

Ad-GFP

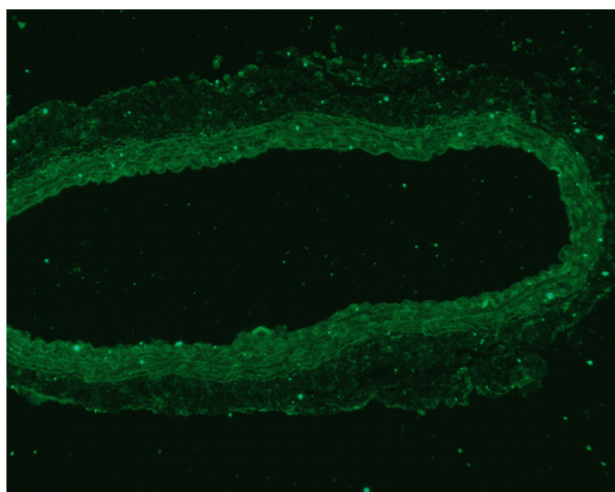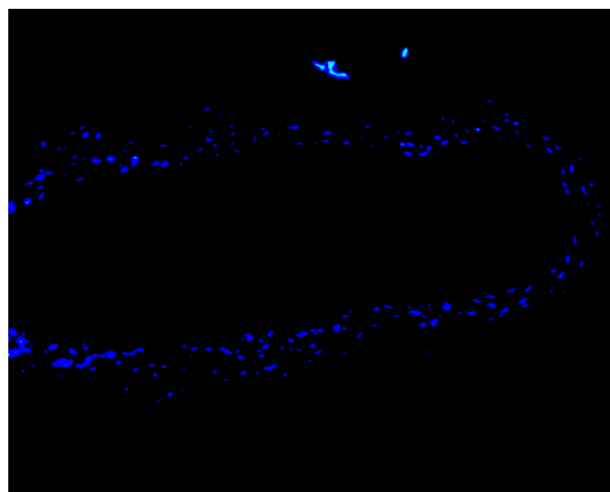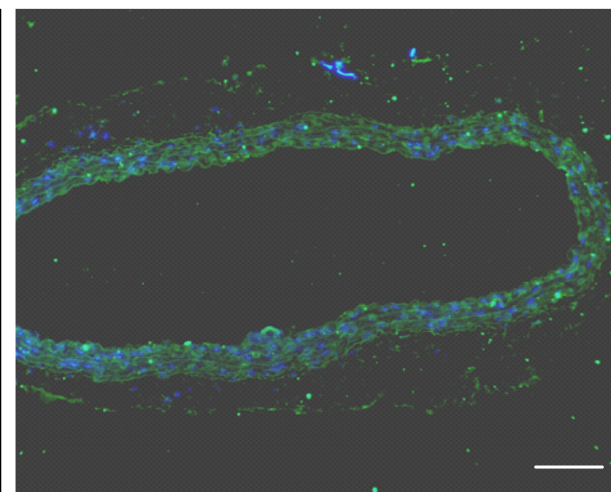

Supplement: 12967_2022_3229_MOESM1_ESM.pdf [file 12967_2022_3229_MOESM1_ESM.pdf]
